# Supplementary material for: Identification of unrecognized host factors promoting HIV-1 latency
Source: PLOS journal article supplement (doi:10.1371/journal.ppat.1009055), 2020-12-03

Figure S3

CRISPRi- CRISPRi+

**A**

JiL-1 cells:

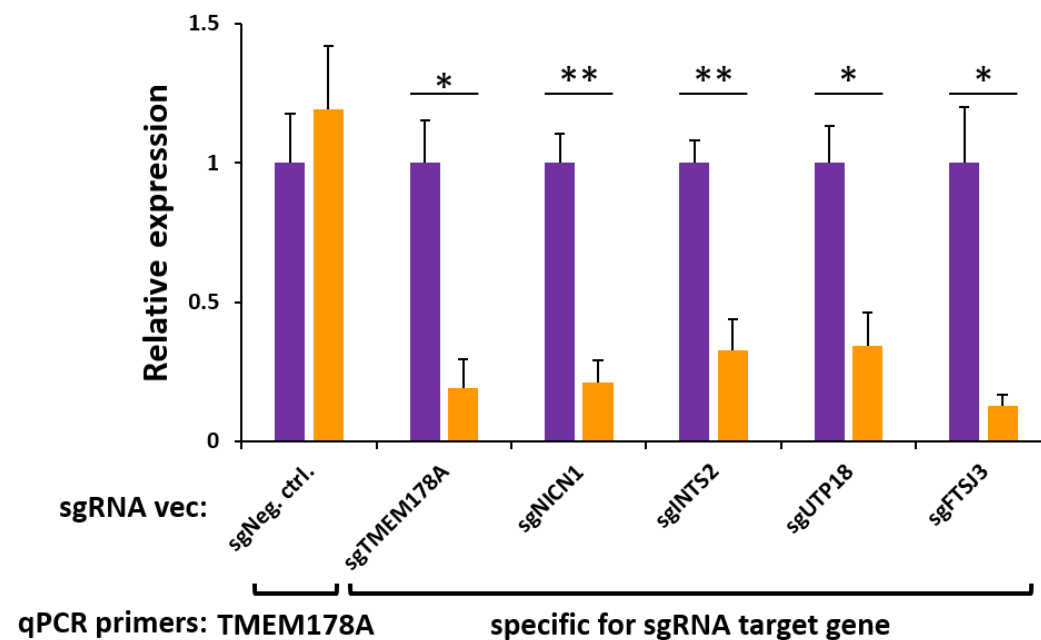

**B**

JiL-1 cells:

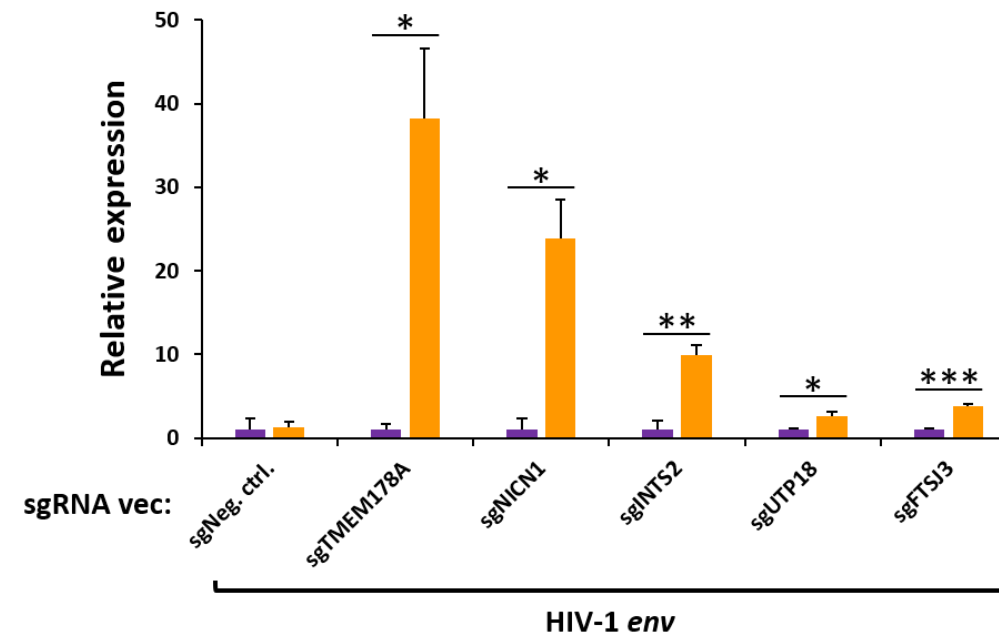

**C**

JiL-2 cells:

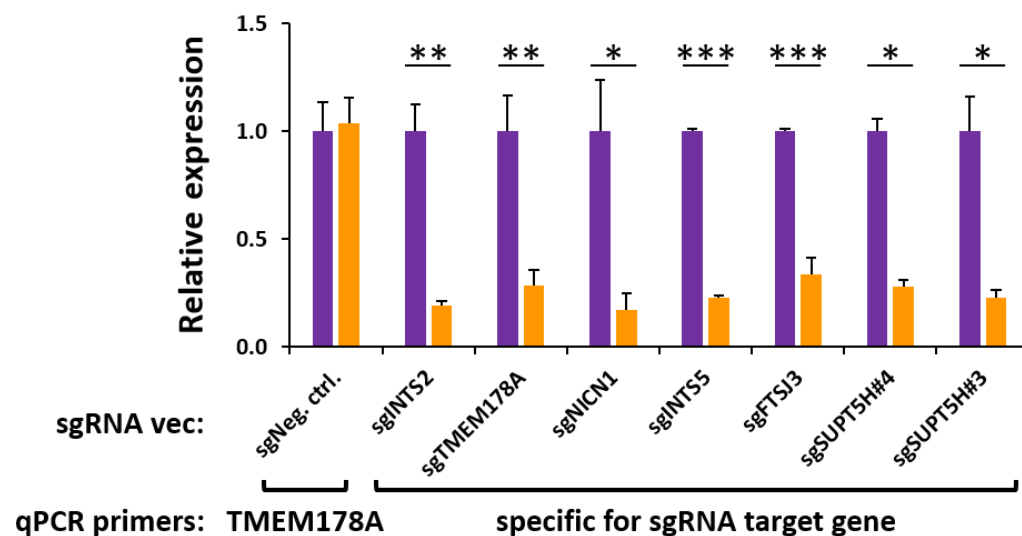

**D**

JiL-3 cells:

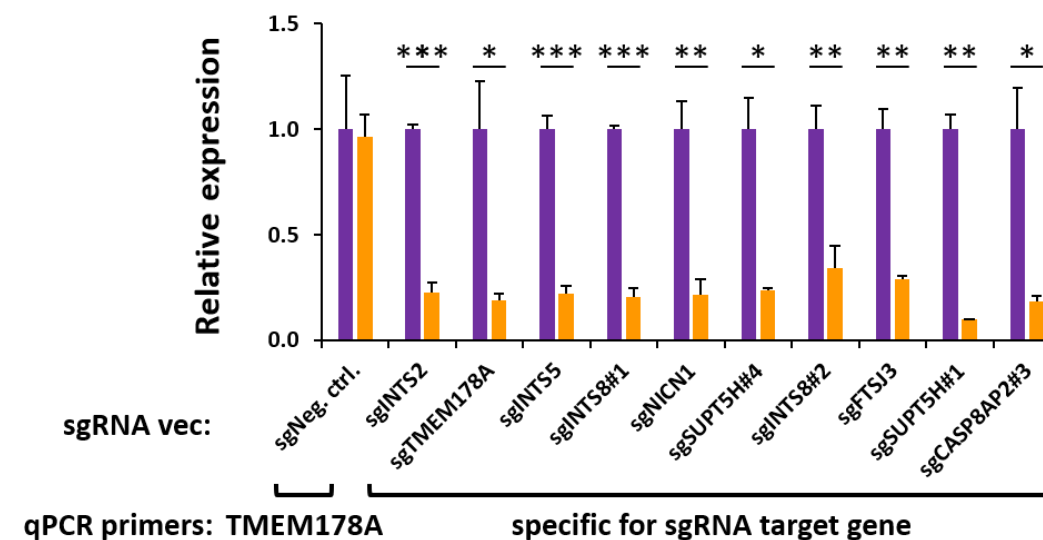

Supplement: S3 (10.1371/journal.ppat.1009055.s003) [file journal.ppat.1009055.s003]
